# Supplementary material for: Voxel-Based Solution Approaches to the Three-Dimensional Irregular Packing Problem
Source: Atypon-hosted journal article supplement (doi:10.1287/opre.2022.2260), 2022-05-04
Supplement: opre.2022.2260.sm1.pdf [file opre.2022.2260.sm1.pdf]

# Online Supplement to “Voxel-based solution approaches to the 3D irregular packing problem”

C. Lamas-Fernandez, A. Martinez-Sykora, J. Bennell

## Problem instances:

The problem instances solved in this article can be found on the website of the EURO Working Group on Cutting and Packing, ESICUP: <https://www.euro-online.org/websites/esicup/>, which hosts several benchmark instances for a variety of cutting and packing problems.

The instances included is summarised on the following table:

| Instance     | Type                 | Source         | Filenames                 |
|--------------|----------------------|----------------|---------------------------|
| Stoyan2      | Voxelised            | [Stoyan2005]   | st05_e2.txt               |
| Stoyan3      | Voxelised            | [Stoyan2005]   | St_05_Example3_normal.txt |
| Merged_i     | Voxelised            | [Egeblad2009]  | Merged*_normal.txt        |
| Experiment_1 | Voxelised            | [Liu2015]      | liu.txt                   |
| Experiment_i | Voxelised            | [Stoyan2004]   | st04_Example*_normal.txt  |
| Blobs_i      | Generated            | -              | blobs/*.txt               |
| Shapes_3D    | Adapted              | [Oliveira2000] | shapesn0_normal.txt       |
| Engine       | Realistic /Voxelised | [Harrell2015]  | engine.txt                |
| Chess        | Realistic /Voxelised | [Edwards2014]  | chess.txt                 |

## Algorithm code:

The code implementing the algorithms proposed on the article can be accessed on the following GitHub repository: [https://github.com/c-lamas/voxel\\_packing](https://github.com/c-lamas/voxel_packing)

## References:

[Stoyan2005] Stoyan YG, Gil NI, Scheithauer G, Pankratov A, Magdalina I (2005) Packing of convex polytopes into a parallelepiped. *Optimization: A Journal of Mathematical Programming and Operations Research* 54(2):215{235, ISSN 0233-1934, URL <http://dx.doi.org/10.1080/02331930500050681>

[Stoyan2004] Stoyan YG, Gil N, Pankratov A, Scheithauer G (2004) Packing non-convex polytopes into a parallelepiped. Technical Report

[Egeblad2009] Egeblad J, Nielsen BK, Brazil M (2009) Translational packing of arbitrary polytopes. *Computational Geometry* 42(4):269{288, ISSN 09257721, URL <http://dx.doi.org/10.1016/j.comgeo.2008.06.003>

[Liu2015] Liu X, Liu JM, Cao AX, Yao ZL (2015) HAPE3D - a new constructive algorithm for the 3D irregular packing problem. *Frontiers of Information Technology & Electronic Engineering* 16(5):380{390, ISSN 2095-9184, URL <http://dx.doi.org/10.1631/FITEE.1400421>

[Oliveira2000] Oliveira JF, Gomes AM, Ferreira JS (2000) TOPOS - A new constructive algorithm for nesting problems. *OR Spektrum* 22(2):263, ISSN 01716468, URL <http://dx.doi.org/10.1007/s002910050105>

[Harrell2015] Harrell E (2015) Toyota 4 Cylinder Engine 22RE, Complete working model. URL <http://www.thingiverse.com/thing:644933>

[Edwards2014] Edwards T (2014) Classic Chess Set from glChess. URL <https://www.thingiverse.com/thing:322616>
